# Supplementary material for: Expanding the Genetic Landscape of Craniofacial Anomalies Through Transcriptome-Wide Association Studies
Source: Research Square preprint supplement (doi:10.21203/rs.3.rs-7645057/v1), 2025-10-17
Supplement: Supplementary file 1 [file 7516436b524b62b884088c20.xlsx]

## Sheet: Supp Table 1. Known CFA Genes
ABCA12	ERF	NECTIN1	SOX6
ABCA4	ESCO2	NECTIN2	SP8
ABCB1	ESR1	NEDD4L	SPECC1L
ABCC9	ESRP2	NIPBL	SPRY1
ACACB	EVC	NOG	SPRY2
ACBD5	EVC2	NOTCH2	SPRY4
ACSS2	EYA1	NTN1	ST2
ACTB	FAM20C	NUDT6	STAG2
ACTC1	FBLN1	OFD1	STIL
ACTG1	FBN1	PAX1	STK11
ADAMTSL4	FGD1	PAX3	SUFU
ADH7	FGF10	PAX6	SUMO1
AHDC1	FGF8	PAX7	TBC1D32
ALPL	FGF9	PAX9	TBX1
ALX1	FGFR1	PDE4D	TBX10
ALX3	FGFR2	PDE8A	TBX2
ALX4	FGFR3	PDGFC	TBX22
AMELX	FILIP1L	PDGFRA	TCF12
AMER1	FLNA	PGM1	TCOF1
AMMECR1	FLNB	PHEX	TFAP2A
AMOTL1	FOXE1	PHF21A	TFAP2B
ANKH	FOXF2	PHF8	TGDS
ANKRD11	FOXI3	PHYH	TGFB1
ANOS1	FRAS1	PIBF1	TGFB2
ARHGAP29	FREM1	PIEZO2	TGFB3
ARID5B	FREM2	PIGA	TGFBR1
ARSB	FST	PIGN	TGFBR2
ASPH	FTO	PJA1	TGIF1
ASXL1	FZD2	PLCB4	THADA
ASXL3	FZD6	PLCH1	T4
BCOR	GABRB3	PLEKHA5	TIMP2
BMP2	GAD1	PLEKHA7	TLK2
BMP4	GADD45G	PLOD3	TMCO1
BMPR1B,	GAS1	POLR1A	TOPORS
BPNT2,	GDF11	POLR1B	TP63
BRAF	GJA1	POLR1C	TRAF7
BRD4	GLI2	POLR1D	TRRAP
C5orf50	GLI3	POR	TWIST1
CACNA2D3	GNAI3	PORCN	TXNL4A
CADPS	GNAS	PPP1R12A	TXNRD2
CBFB	GNPTAB,	PPP1R21	TYMS
CCNQ	GPC3	PREPL	UBE3B
CD96	GPC4	PRDM16	UFD1
CDC45	GPC6	PRICKLE1	UGT1A9
CDH1	GREM1	PRKAR1A	USP9X
CDH19	GRHL3	PRRX1	VAX1
CDKN1C	GSC	PSAT1	VCAN
CDON	GTF2E2	PTCH1	WDR11
CENPF	GZF1	PTDSS1	WDR19
CFAP57	H1-4	PTHLH	WDR35
CFDP1	HDAC8	PTPN11	WNT5A
CHD5	HNRNPK	PTPRS	WNT7A
CHD7	HUWE1	PVR	WT1
CHN2	HYAL2	RAB23	YAP1
CHRNA7	HYLS1	RAD21	YWHAE
CILK1	IDS	RAX	ZBTB24
CLPTM1	IDUA	RBFOX3	ZEB2
CLPTM1L	IFT122	RBM10	ZIC1
COG1	IFT140	RECQL4	ZIC2
COG5	IFT43	RIMS3	ZNF462
COL11A1	IFT88	RIPK4	ZSWIM6
COL11A2	IGF1R	ROR2
COL17A1	IGF2	RPGRIP1L
COL2A1	IHH	RPL5
COL6A2	IL11RA	RSPRY1
COL8A1,	INPPL1	RUNX2
COL9A1	IRF6	RYK
COL9A2	IRX5	RYR1
COL9A3	ISM1	SALL1
COLEC10	JAG1	SATB2
COLEC11	JAG2	SCARF2
CPLANE1	KAT6A	SCHIP1
CREBBP	KAT6B	SCLT1
CRISPLD2	KDM1A	SCN1A
CRYZ	KDM6A	SCN2A
CTNND1	KIAA0586	SCN4A
CTSK	KIF7	SEC24D
CYP1B1	KLF4	SEMA3E
CYP26B1	KMT2D	SF3B2
DAB1	KRAS	SF3B4
DARS1	LHX8	SHH
DCAF4L2	LIPH	SHOC2
DCHS2	LOXL3	SHROOM3
DDX59	LRP2	SIN3A
DEAF1	LRP8	SIX1
DENND4B	LTBP1	SIX2
DHCR7	MAFB	SIX3
DHODH	MAP3K7	SIX5
DISP1	MASP1	SKI
DLG1	MED13L	SLC19A1
DLL1	MED25	SLC25A24
DLX4	MEGF8	SMAD2
DLX5	MEIS2	SMAD3
DLX6	MIB1	SMAD4
DNAH5	MID1	SMAD6
DPF2	MIPOL1	SMARCA4
DPH1	MIR17HG	SMARCB1
DUSP22	MKS1	SMC1A
DVL1	MMP3	SMC3
DVL3	MN1	SMG9
EDAR	MSX1	SMO
EDN1	MSX2	SMS
EDNRA	MTHFR	SMURF1
EFNA4	MTX2	SNAP29
EFNB1	MYC	SNRPB
EFTUD2	MYCN	SNTG1
EHMT1	MYH3	SON
EIF4A3	MYMK	SOST
EP300	MYT1	SOX11
EPHA3	NBAS	SOX6

## Sheet: Supp Table 2. CFA Phecodes
phecode	phecode string
CM_754	Congenital malformations of tongue, mouth and pharynx
CM_754.1	Oral cleft
CM_754.11	Cleft palate
CM_754.111	Cleft palate with cleft lip
CM_754.12	Cleft lip (without cleft palate)
CM_754.14	Cleft uvula [Bifid uvula]
CM_754.3	Congenital malformations of mouth
CM_754.31	Macrostomia
CM_754.32	Microstomia
CM_754.4	Congenital malformations of lips
CM_754.41	Macrocheilia
CM_754.42	Microcheilia
CM_754.5	Congenital malformations of tongue
CM_754.52	Macroglossia
CM_754.6	Congenital malformations of salivary glands and ducts
CM_754.7	Congenital anomalies of pharynx
CM_754.71	Congenital pharyngeal pouch [Diverticulum of pharynx]
CM_755	Congenital deformities of skull, face, and jaw
CM_755.1	Congenital facial asymmetry
CM_755.2	Abnormal skull shape
CM_755.21	Dolichocephaly
CM_755.22	Plagiocephaly
CM_755.23	Craniosynostosis
CM_755.3	Craniofacial dysostosis
CM_755.31	Mandibulofacial dysostosis
CM_755.4	Macrocephaly
CM_755.5	Hypertelorism
CM_755.6	Congenital anomalies of nose
CM_755.61	Choanal atresia
CM_755.62	Fissured, notched and cleft nose
CM_755.63	Agenesis and underdevelopment of nose
CM_755.7	Wide cranial sutures of newborn

## Sheet: Supp. Table 3. All CA Phecodes
phecode	phecode string
CM_750	Congenital malformations of nervous system
CM_750.1	Congenital malformations of brain
CM_750.11	Aplasia/Hypoplasia of the brain
CM_750.111	Microcephaly
CM_750.112	Anencephalus and similar anomalies
CM_750.113	Congenital reduction deformities of brain
CM_750.114	Septo-optic dysplasia of brain
CM_750.115	Holoprosencephaly
CM_750.12	Congenital malformations of corpus callosum
CM_750.13	Megalencephaly
CM_750.14	Congenital cerebral cysts
CM_750.15	Congenital hydrocephalus
CM_750.151	Malformations of aqueduct of Sylvius
CM_750.152	Atresia of foramina of Magendie and Luschka
CM_750.16	Arnold-Chiari syndrome
CM_750.2	Neural tube defects and congenital disorders of the spinal cord
CM_750.21	Spina bifida
CM_750.22	Spina bifida occulta
CM_750.23	Congenital sacral dimple
CM_750.24	Encephalocele
CM_750.26	Hydromyelia
CM_750.27	Diastematomyelia
CM_751	Congenital anomalies of eye
CM_751.1	Congenital disorders of the orbit
CM_751.11	Aplasia/Hypoplasia affecting the eye
CM_751.111	Cystic eyeball
CM_751.112	Microphthalmos
CM_751.113	Anophthalmos
CM_751.2	Congenital malformations of anterior segment of eye
CM_751.21	Congenital lens anomalies
CM_751.211	Congenital aphakia
CM_751.212	Spherophakia
CM_751.213	Congenital cataract
CM_751.214	Congenital displaced lens (Ectopia lentis)
CM_751.215	Coloboma of lens
CM_751.22	Congenital malformations of iris
CM_751.221	Absence of iris [Aniridia]
CM_751.222	Rieger’s anomaly
CM_751.23	Congenital corneal malformations
CM_751.231	Congenital corneal opacity
CM_751.24	Congenital anomalies of sclera
CM_751.241	Blue sclera
CM_751.3	Congenital malformations of posterior segment of eye
CM_751.31	Congenital malformation of vitreous humor
CM_751.32	Congenital malformation of retina
CM_751.33	Congenital malformation of optic disc
CM_751.34	Congenital malformation of choroid
CM_751.4	Congenital glaucoma and buphthalmos
CM_751.5	Coloboma
CM_751.6	Macrophthalmosa
CM_751.7	Congenital anomalies of eyelids
CM_751.71	Congenital malformations of eyelid
CM_751.711	Congenital ptosis
CM_751.8	Congenital anomalies of lacrimal gland
CM_752	Congenital malformations of ear
CM_752.1	Aplasia/Hypoplasia of the external ear
CM_752.11	Microtia
CM_752.12	Congenital absence of external ear [Anotia]
CM_752.2	Macrotia
CM_752.3	Accessory auricle
CM_752.4	Misplaced ear [Abnormal location of ears]
CM_752.5	Prominent ear [Protruding ear]
CM_752.6	Congenital absence, atresia and stricture of auditory canal
CM_752.7	Congenital anomaly of middle ear
CM_752.8	Congenital malformation of inner ear
CM_753	Congenital malformations of face and neck
CM_753.1	Branchial anomaly
CM_753.2	Preauricular sinus and cyst
CM_753.3	Webbing of neck
CM_754	Congenital malformations of tongue, mouth and pharynx
CM_754.1	Oral cleft
CM_754.11	Cleft palate
CM_754.111	Cleft palate with cleft lip
CM_754.12	Cleft lip (without cleft palate)
CM_754.14	Cleft uvula [Bifid uvula]
CM_754.3	Congenital malformations of mouth
CM_754.31	Macrostomia
CM_754.32	Microstomia
CM_754.4	Congenital malformations of lips
CM_754.41	Macrocheilia
CM_754.42	Microcheilia
CM_754.5	Congenital malformations of tongue
CM_754.52	Macroglossia
CM_754.6	Congenital malformations of salivary glands and ducts
CM_754.7	Congenital anomalies of pharynx
CM_754.71	Congenital pharyngeal pouch [Diverticulum of pharynx]
CM_755	Congenital deformities of skull, face, and jaw
CM_755.1	Congenital facial asymmetry
CM_755.2	Abnormal skull shape
CM_755.21	Dolichocephaly
CM_755.22	Plagiocephaly
CM_755.23	Craniosynostosis
CM_755.3	Craniofacial dysostosis
CM_755.31	Mandibulofacial dysostosis
CM_755.4	Macrocephaly
CM_755.5	Hypertelorism
CM_755.6	Congenital anomalies of nose
CM_755.61	Choanal atresia
CM_755.62	Fissured, notched and cleft nose
CM_755.63	Agenesis and underdevelopment of nose
CM_755.7	Wide cranial sutures of newborn
CM_757	Congenital anomalies of upper GI tract
CM_757.1	Congenital malformations of esophagus
CM_757.11	Congenital tracheoesophageal fistula, esophageal atresia and stenosis
CM_757.111	Esophageal web
CM_757.12	Congenital dilatation of esophagus
CM_757.13	Congenital diverticulum of esophagus
CM_757.2	Congenital malformation of stomach
CM_757.21	Congenital hypertrophic pyloric stenosis
CM_757.22	Congenital hiatus hernia
CM_758	Congenital malformations of digestive system
CM_758.1	Congenital malformations of intestine
CM_758.11	Meckel diverticulum
CM_758.12	Hirschsprung’s disease
CM_758.13	Intestinal atresia and stenosis
CM_758.131	Atresia and stenosis of small intestines
CM_758.132	Atresia and stenosis of large intestines
CM_758.14	Anomalies of intestinal fixation
CM_758.15	Intestinal duplication
CM_758.16	Ectopic anus
CM_758.17	Persistent cloaca
CM_758.2	Congenital malformations of gallbladder, bile ducts and liver
CM_758.21	Biliary atresia
CM_758.22	Cystic liver disease
CM_758.3	Congenital anomalies of the pancreas
CM_758.31	Annular pancreas
CM_760	Congenital anomalies of genital organs
CM_760.1	Congenital malformations of female genitalia
CM_760.11	Congenital malformation of ovary
CM_760.111	Congenital absence of ovary
CM_760.112	Ovarian streak
CM_760.12	Congenital malformations of fallopian tube and broad ligament
CM_760.13	Congenital anomalies of uterus and cervix
CM_760.131	Aplasia and hypoplasia of uterus
CM_760.132	Doubling of uterus
CM_760.133	Bicornate uterus
CM_760.134	Unicornate uterus
CM_760.135	Arcuate uterus
CM_760.15	Congenital malformations of vagina
CM_760.151	Vaginal agenesis
CM_760.152	Doubling of vagina/Vaginal septum
CM_760.153	Imperforate hymen
CM_760.16	Congenital malformations of vulva
CM_760.161	Fusion of labia
CM_760.17	Embryonic cyst of cervix, vagina, and external female genitalia
CM_760.18	Congenital malformation of clitoris
CM_760.2	Congenital malformations of male genital organs
CM_760.21	Congenital malformations of testis and scrotum
CM_760.211	Undescended testis [Cryptorchidism]
CM_760.212	Retractile testis
CM_760.213	Ectopic testis
CM_760.214	Aplasia/hypoplasia of testis
CM_760.215	Scrotal transposition
CM_760.22	Congenital malformations of penis
CM_760.221	Hypospadias
CM_760.222	Congenital chordee
CM_760.223	Hypoplasia of penis
CM_760.224	Hidden penis
CM_760.225	Congenital torsion of penis
CM_760.226	Curvature of penis (lateral)
CM_760.227	Epispadias
CM_760.25	Congenital malformations of vas deferens, epididymis, seminal vesicles and prostate
CM_760.26	Congenital hydrocele
CM_760.3	Indeterminate sex and hermaphroditism
CM_761	Congenital malformations of the urinary system
CM_761.1	Congenital malformation of kidney
CM_761.11	Renal hypoplasia/aplasia
CM_761.111	Renal agenesis
CM_761.112	Renal hypoplasia
CM_761.12	Renal dysplasia
CM_761.13	Cystic kidney disease
CM_761.131	Medullary cystic kidney
CM_761.16	Accessory kidney
CM_761.17	Lobulated, fused and horseshoe kidney
CM_761.18	Ectopic kidney
CM_761.19	Hyperplastic and giant kidney
CM_761.2	Congenital malformations of ureter and renal pelvis
CM_761.21	Obstructive defects of renal pelvis and ureter, congenital
CM_761.211	Congenital hydronephrosis
CM_761.212	Congenital ureterocele
CM_761.23	Congenital megaureter
CM_761.24	Agenesis of ureter
CM_761.25	Duplication of ureter
CM_761.26	Malposition of ureter
CM_761.3	Congenital malformations of bladder and urethra
CM_761.31	Bladder exstrophy
CM_761.32	Congenital posterior urethral valves
CM_761.33	Congenital atresia and stenosis of urethra and bladder neck
CM_761.34	Abnormality of the urachus
CM_761.35	Congenital absence of bladder and urethra
CM_762	Congenital malformations of respiratory system
CM_762.1	Congenital malformations of larynx
CM_762.11	Laryngeal web
CM_762.12	Congenital subglottic stenosis
CM_762.13	Laryngeal hypoplasia
CM_762.14	Laryngocele
CM_762.15	Congenital laryngomalacia
CM_762.2	Congenital malformations of trachea and bronchus
CM_762.3	Congenital malformations of lung
CM_762.31	Congenital cystic lung
CM_762.32	Congenital bronchiectasis
CM_762.33	Congenital hypoplasia and dysplasia of lung
CM_762.34	Accessory lobe of lung
CM_762.35	Sequestration of lung [Pulmonary sequestration]
CM_763	Congenital anomalies of the heart
CM_763.1	Congenital malformations of great arteries
CM_763.11	Common arterial trunk [Truncus arteriosus]
CM_763.12	Transposition of great vessels [TGA]
CM_763.13	Patent ductus arteriosus
CM_763.14	Congenital anomalies of aorta
CM_763.141	Coarctation of aorta
CM_763.142	Interruption of aortic arch
CM_763.143	Congenital atresia and stenosis of aorta
CM_763.144	Aplasia or hypoplasia of aorta
CM_763.145	Congenital dilation or aneurysm of aorta
CM_763.146	Vascular ring of aorta
CM_763.147	Right aortic arch
CM_763.15	Anomalies of pulmonary artery, congenital
CM_763.151	Pulmonary artery coarctation and atresia
CM_763.152	Stenosis of pulmonary artery
CM_763.153	Congenital pulmonary arteriovenous malformation
CM_763.16	Double outlet right ventricle
CM_763.17	Double outlet left ventricle
CM_763.18	Congenital Pulmonary infundibular stenosis
CM_763.2	Congenital malformations of heart valves
CM_763.21	Congenital anomalies of pulmonary valve
CM_763.211	Congenital pulmonary valve atresia
CM_763.2	Congenital pulmonary valve stenosis
CM_763.213	Congenital pulmonary valve insufficiency
CM_763.22	Congenital malformations of tricuspid valve
CM_763.221	Congenital tricuspid stenosis
CM_763.222	Ebstein anomaly of the tricuspid valve
CM_763.23	Congenital malformation of aortic and mitral valves
CM_763.231	Congenital stenosis of aortic valve
CM_763.232	Congenital insufficiency of aortic valve
CM_763.233	Congenital mitral stenosis
CM_763.234	Congenital mitral insufficiency
CM_763.24	Hypoplastic right heart syndrome
CM_763.3	Congenital malformations of cardiac chambers and connections
CM_763.31	Ventricular septal defect
CM_763.32	Atrial septal defect
CM_763.321	Patent foramen ovale
CM_763.33	Atrioventricular septal defect
CM_763.34	Cor triatriatum
CM_763.35	Aortopulmonary septal defect
CM_763.36	Common ventricle or double inlet ventricle
CM_763.4	Tetralogy of Fallot
CM_763.5	Congenital subaortic stenosis
CM_763.6	Anomalous pulmonary venous return
CM_763.7	Hypoplastic left heart syndrome
CM_763.8	Congenital heart block
CM_763.9	Congenital anomaly of the coronary artery
CM_764	Congenital malformations of circulatory system (other than heart)
CM_764.1	Congenital anomalies of great veins
CM_764.11	Persistent left superior vena cava
CM_764.12	Congenital anomaly of gastrointestinal vessel [Anomalous portal venous connection]
CM_764.2	Congenital absence and hypoplasia of umbilical artery
CM_764.3	Congenital malformations of renal artery
CM_764.5	Congenital arteriovenous malformation
CM_765	Congenital deformities of hip
CM_765.1	Congenital dislocation of hip
CM_765.11	Congenital dislocation of hip, bilateral
CM_765.2	Congenital coxa valga, congenital
CM_765.3	Congenital coxa vara, congenital
CM_766	Congenital deformities of feet
CM_766.1	Congenital talipes varus
CM_766.11	Congenital talipes equinovarus
CM_766.12	Congenital metatarsus primus varus
CM_766.13	Congenital pes cavus
CM_766.2	Congenital talipes valgus
CM_766.21	Congenital talipes calcaneovalgus
CM_766.22	Congenital pes planus
CM_767	Congenital anomalies of limbs
CM_767.1	Abnormal digit morphology
CM_767.11	Polydactyly
CM_767.12	Syndactyly
CM_767.2	Reduction defects of limb
CM_767.21	Reduction defects of upper limb
CM_767.22	Reduction defects of lower limb
CM_767.3	Congenital deformity of knee
CM_767.6	Bowing of the long bones
CM_768	Congenital deformities of chest and bony thorax
CM_768.1	Chest wall deformities
CM_768.11	Pectus excavatum
CM_768.12	Pectus carinatum
CM_768.2	Congenital anomalies of ribs and sternum
CM_768.21	Cervical rib
CM_769	Congenital malformations of spine
CM_769.1	Klippel-Feil syndrome
CM_769.2	Congenital scoliosis
CM_769.3	Congenital kyphosis
CM_769.4	Congenital lordosis
CM_769.7	Congenital spondylolisthesis
CM_770	Other congenital malformations of musculoskeletal system
CM_770.1	Congenital malformations of diaphragm
CM_770.11	Congenital diaphragmatic hernia
CM_770.2	Congenital malformations of abdominal wall
CM_770.21	Exomphalos [Omphalocele]
CM_770.22	Gastroschisis
CM_770.23	Prune belly syndrome
CM_770.3	Congenital musculoskeletal deformities of sternocleidomastoid muscle
CM_770.4	Arthrogryposis multiplex congenita
CM_770.5	Congenital osteodystrophies
CM_771	Congenital malformations of integument
CM_771.1	Congenital malformation of the skin
CM_771.11	Congenital pigmentary anomalies of skin
CM_771.14	Congenital non-neoplastic nevus
CM_771.2	Congenital anomalies of hair
CM_771.3	Congenital anomalies of nails
CM_771.4	Congenital anomalies of breast
CM_772	Congenital disorder of endocrine glands
CM_772.1	Congenital malformations of endocrine glands
CM_772.11	Congenital anomalies of adrenal gland
CM_772.2	Congenital hypothyroidism
CM_772.3	Congenital iodine-deficiency syndrome
CM_773	Congenital malformations of spleen
CM_773.1	Asplenia
CM_774	Situs inversus and related disorders
CM_774.1	Situs inversus
CM_774.2	Malposition of heart and cardiac apex
